# Supplementary material for: Application of a geospatial query tool to characterise the community food environment and examine associations with dietary quality: evidence from three Chilean cities from the SALURBAL project
Source: BMC Public Health. 2025 Jul 3;25:2311. doi: 10.1186/s12889-025-23392-x (PMC12224401; doi:10.1186/s12889-025-23392-x)
Supplement: Supplementary file 2 — Supplementary Material 2 [file 12889_2025_23392_MOESM2_ESM.docx]

## Additional file 2. Inclusion flow chart.


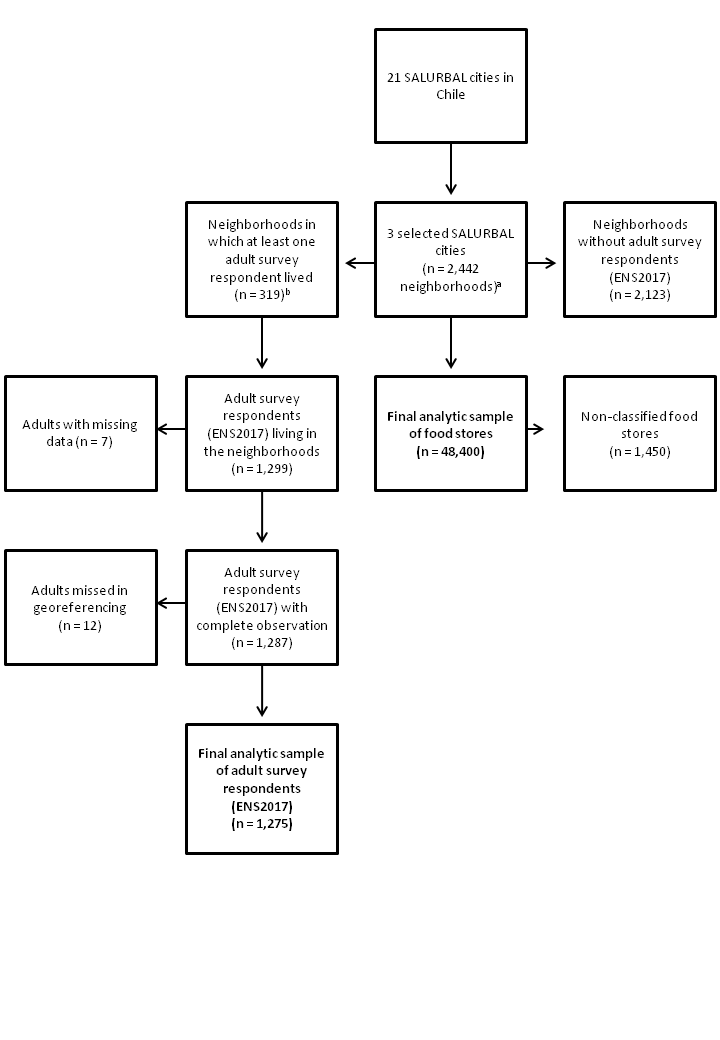


aFinal analytic sample of neighbourhoods considered to describe the community retail food environment in the three cities. bFinal analytic sample of neighbourhoods considered to analyse the community retail food environment of the survey respondents.
